# Supplementary material for: Toll-like receptor 4 signaling in neurons of trigeminal ganglion contributes to nociception induced by acute pulpitis in rats
Source: PubMed Central journal article supplement (PMC4519790; doi:10.1038/srep12549), 2015-07-30
Supplement: srep12549-s1.pdf [file srep12549-s1.pdf]

## Supplementary materials

### ***For Toll-like receptor 4 signaling in neurons of trigeminal ganglion contributes to pain induced by acute pulpitis in rats***

Jia-Ji Lin <sup>1,2\*</sup>, Yi Du <sup>3,4\*</sup>, Wen-Ke Cai <sup>5,1\*</sup>, Rong Kuang <sup>3\*</sup>, Ting Chang <sup>1</sup>, Zhuo Zhang <sup>1</sup>, Yong-Xiang Yang <sup>1</sup>, Chao Sun <sup>1</sup>, Zhu-Yi Li <sup>1#</sup>, Fang Kuang <sup>2#</sup>

<sup>1</sup>Department of Neurology, Tangdu Hospital, The Fourth Military Medical University, Xi'an, Shannxi, 710004, China.

<sup>2</sup>Institute of Neurosciences, The Fourth Military Medical University, Xi'an, Shannxi, 710032, China.

<sup>3</sup>State Key Laboratory of Military Stomatology, Department of Operative Dentistry and Endodontics, School of Stomatology, The Fourth Military Medical University, Xi'an, Shannxi, 710032, China.

<sup>4</sup>Department of Endodontics, Jinan Stomatological Hospital, Jinan, Shandong, 250001, China.

<sup>5</sup>Department of Cardio-Thoracic Surgery, Kunming General Hospital of Chengdu Military Region, Kunming, Yunnan, 650000, China.

\* The authors contributed equally to this work.

# Corresponding author.

**Figure s1:**

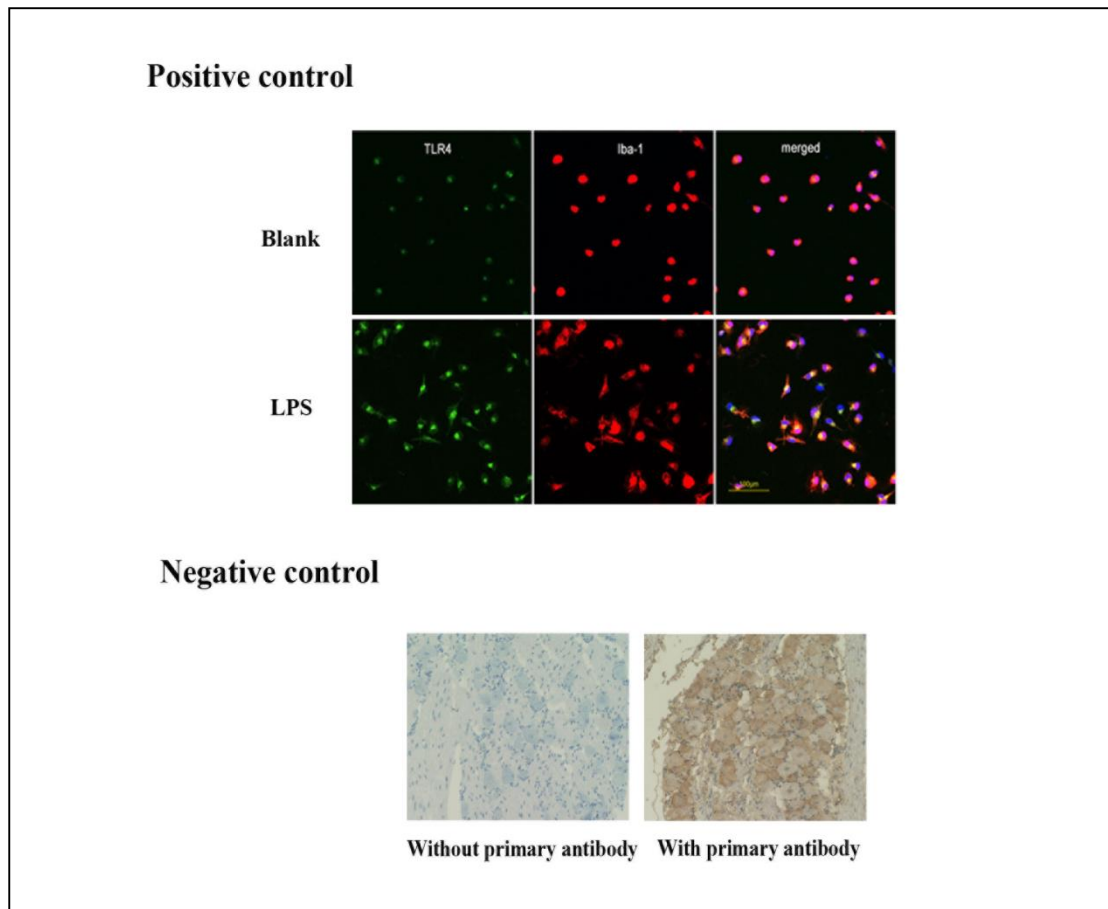

**Figure s1** Positive and negative controls for TLR4 antibody. Positive control: increased expression of TLR4 were found in cultured N9 microglia stimulated by LPS, compared with blank. The microglial cells were marked with the Iba-1 immunolabeling. Negative control: the sections of left TG of AP-1 were incubated with/without the primary antibody in the DAB staining with haematoxylin for nucleus.

**Figure s2:**

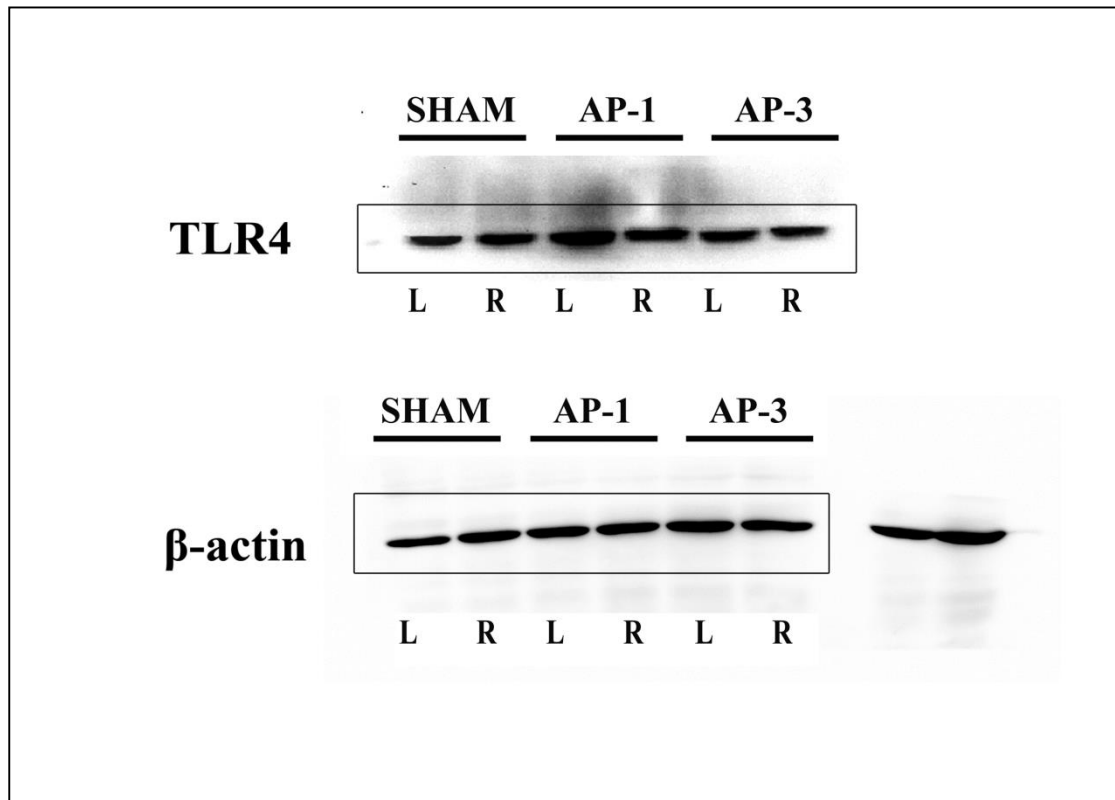

**Figure s2** Unedited full-size blots of Supplementary figure 2.

**Figure s3:**

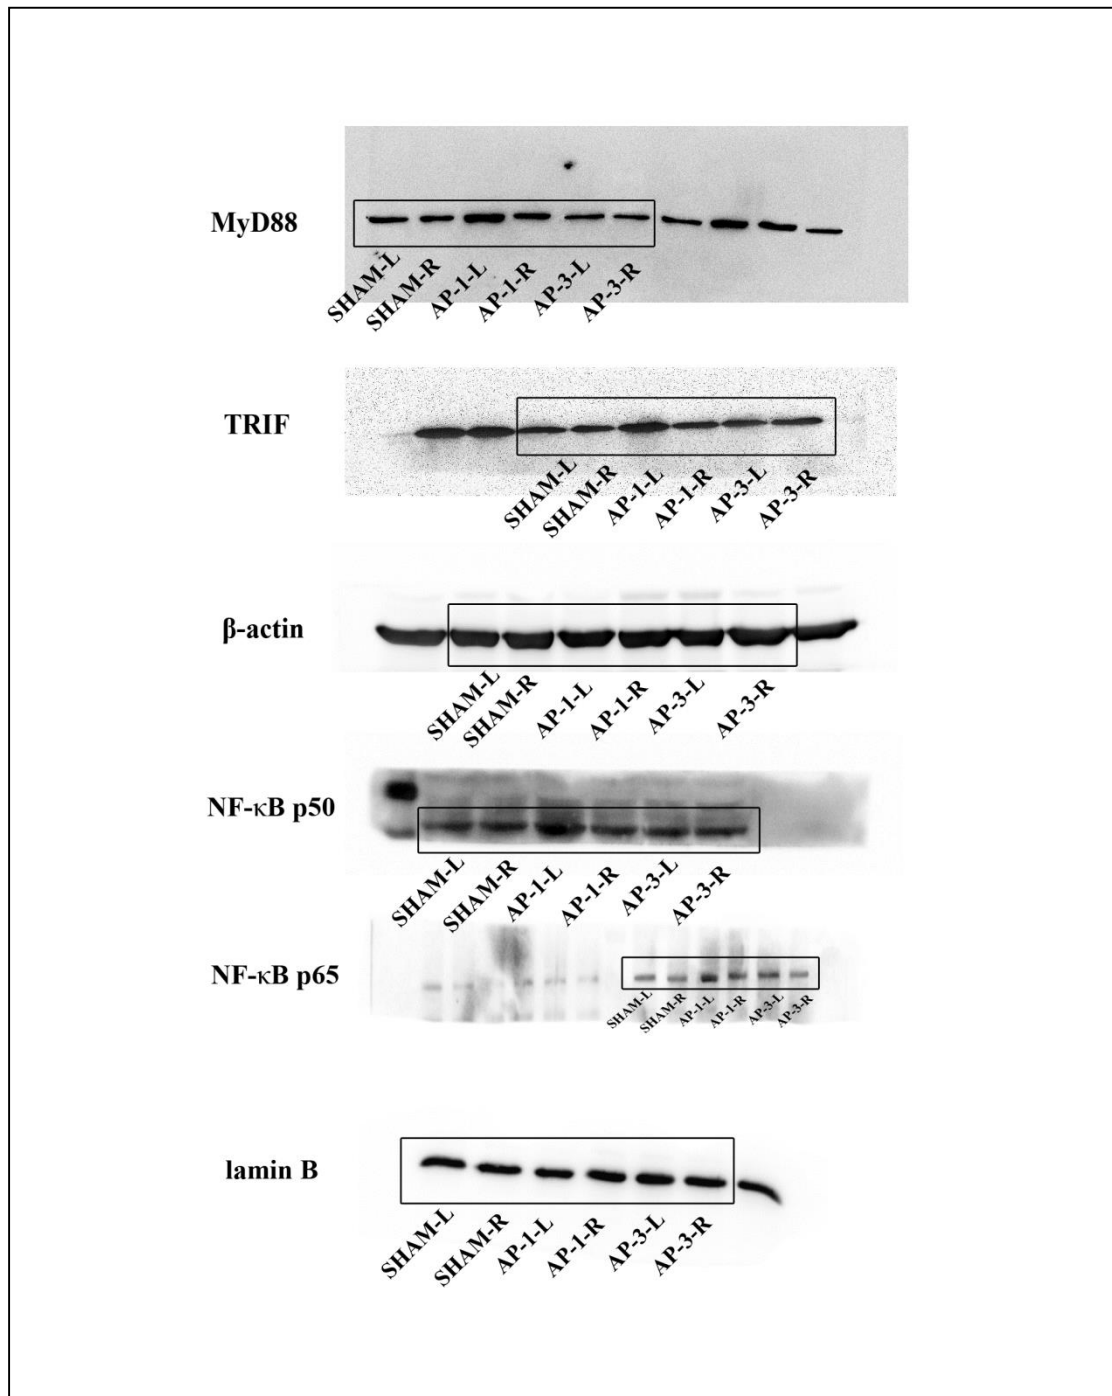

**Figure s3** Unedited full-size blots of Supplementary figure 4.

**Figure s4:**

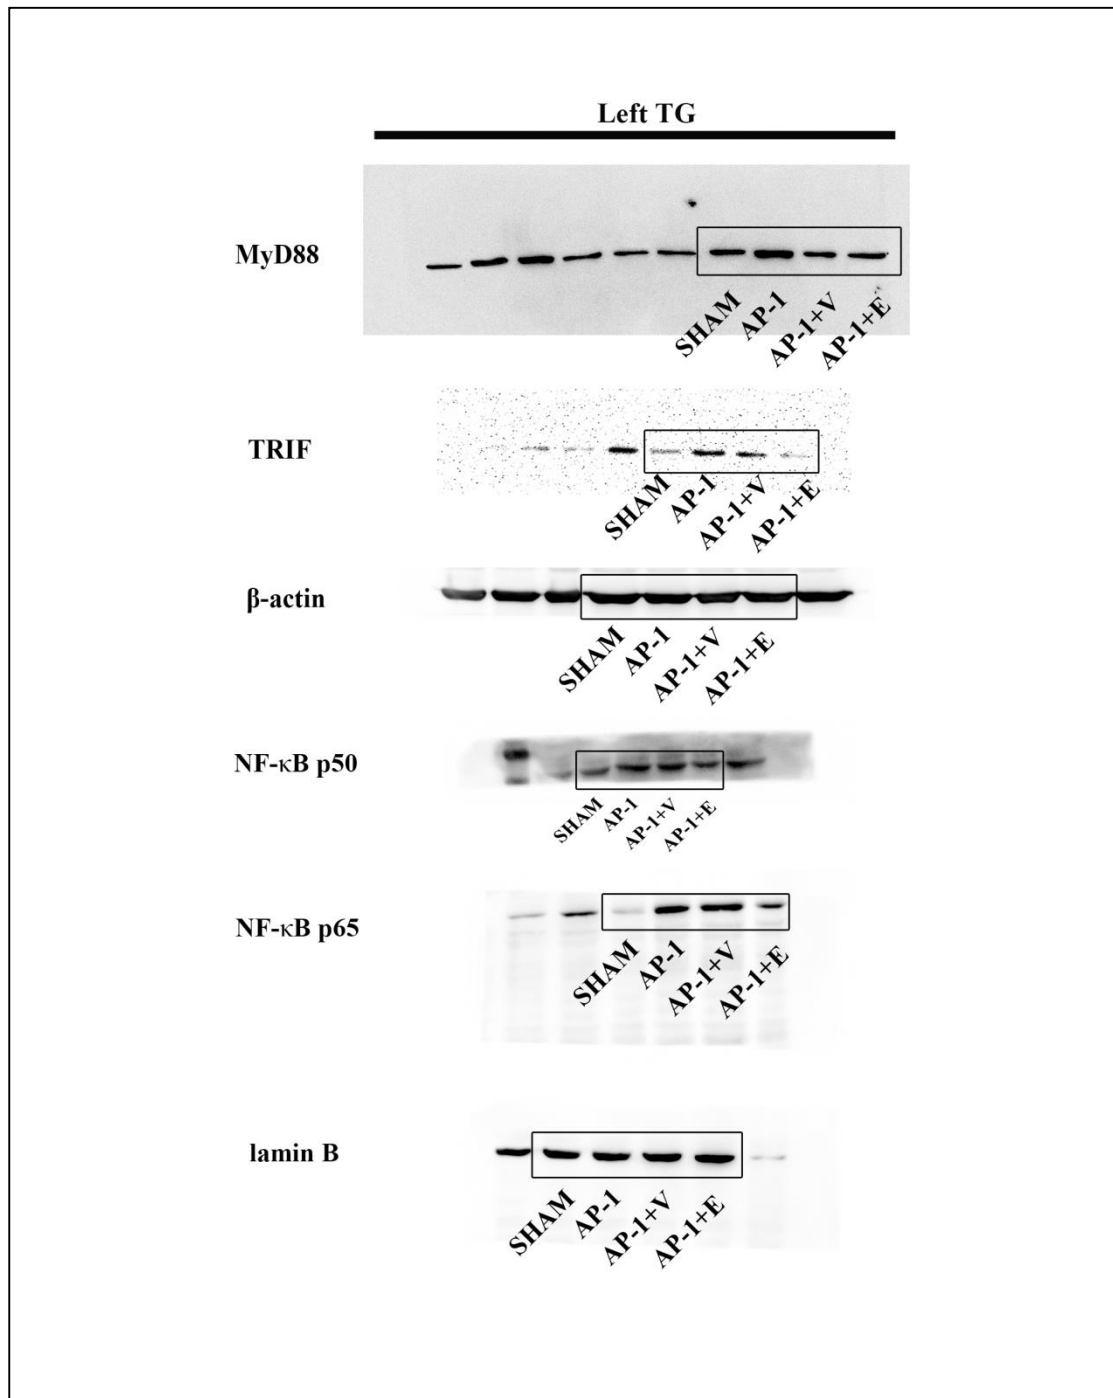

**Figure s4** Unedited full-size blots of Supplementary figure 6.
